# Supplementary material for: How does the downstream boundary affect avulsion dynamics in a laboratory bifurcation?
Source: Copernicus journal article supplement (doi:10.5194/esurf-2019-26), 2019-06-05
Supplement: Supplementary file 1 [file esurf-2019-26-supplement.pdf]

## Contents

1. Figures S1 to S4
2. Table S1
3. Text S1

## 5 Introduction

Our supplementary information is organized as follows: First, we provide four supporting figures. Figure S1 shows time series of the delta front positions for each experiment. Figure S2 shows the time evolution of the bed elevation profiles for experiments 4 and 5. Figure S3 provides the final water/bed topography around the bifurcation point for experiment 5. Finally, Figure S4 and Table S1 show our estimates of the Shields stress, and should be viewed in the context of Text S1, which describes the methodology and limitations of calculating the Shields stress.

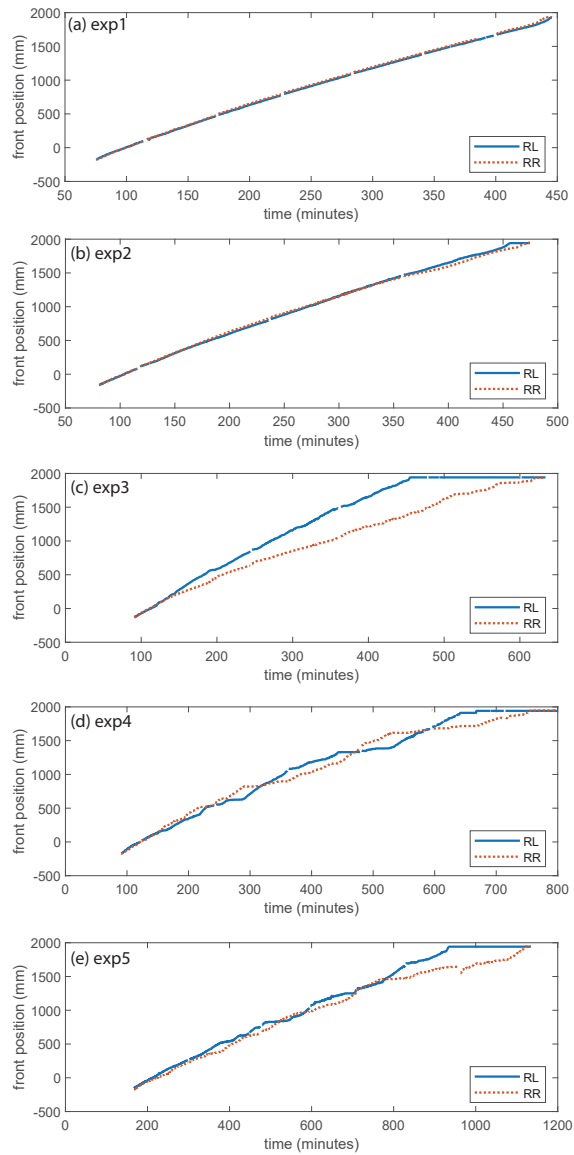

**Figure S1.** Position of delta fronts (topset/foreset slope break) over time for each of the five experiments. A position of 0 is defined as the location where the branches split. The method for extracting the delta front positions is described in the main paper.

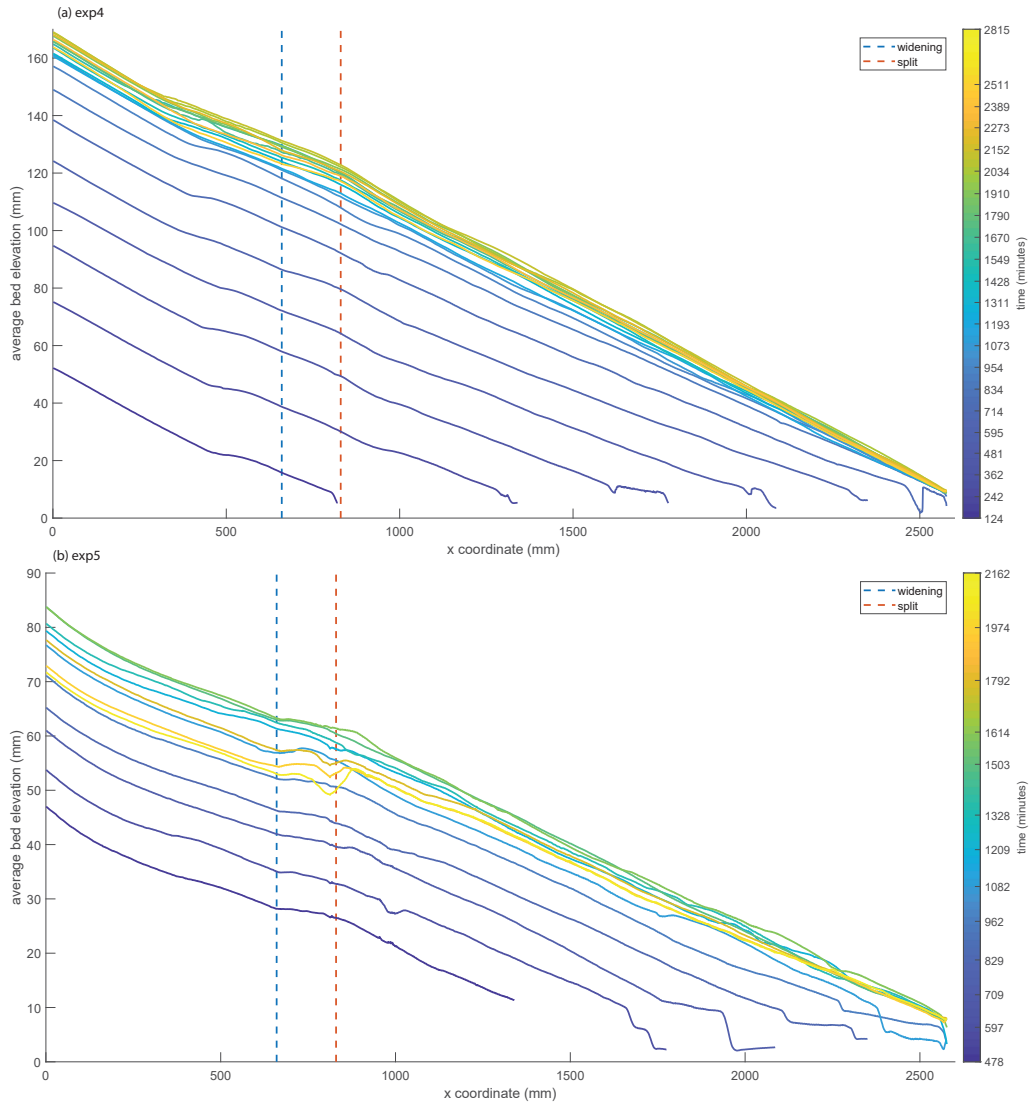

**Figure S2.** Time evolution of bed elevation profiles for (a) experiment 4 and (b) experiment 5. Profile colors indicate the time at which topographic scan was taken. Each point in the profile is an average of all bed elevations at that given  $x$  position, where  $x$  is the cartesian coordinate oriented parallel to the upstream channel direction, and increases with distance downstream. For reference, the dotted vertical lines indicate the start of the widening portion of the bifurcation flume, and the position of the nose/split. Note the 1 cm of variability in bed elevation in experiment 4 after start of bypass phase upstream of the split, linked to bypass dynamics discussed in the main paper. For experiment 5, note that the final profile is significantly lower than the maximum elevation profile; erosion coincided with consolidation of the flow into a single channel.

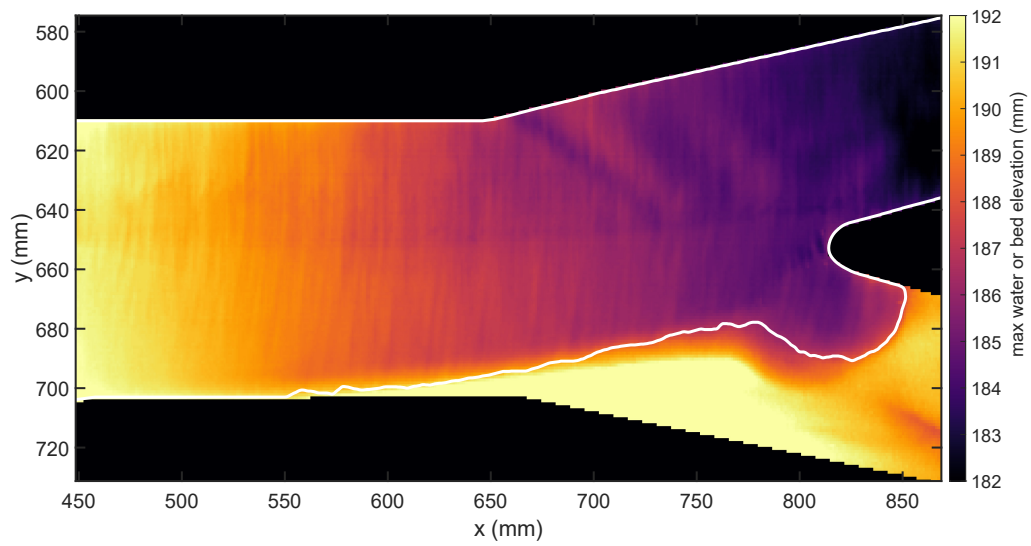

**Figure S3.** Detail of the bifurcation using final bed and water elevations from experiment 5. Flow direction is from left to right, Image shows water elevation in wetted regions, and bed elevation in dry regions. The solid white line delineates the land/water interface; the river right branch is completely dry. The bed elevation of the river right branch is several millimeters higher than the water surface elevation immediately upstream.

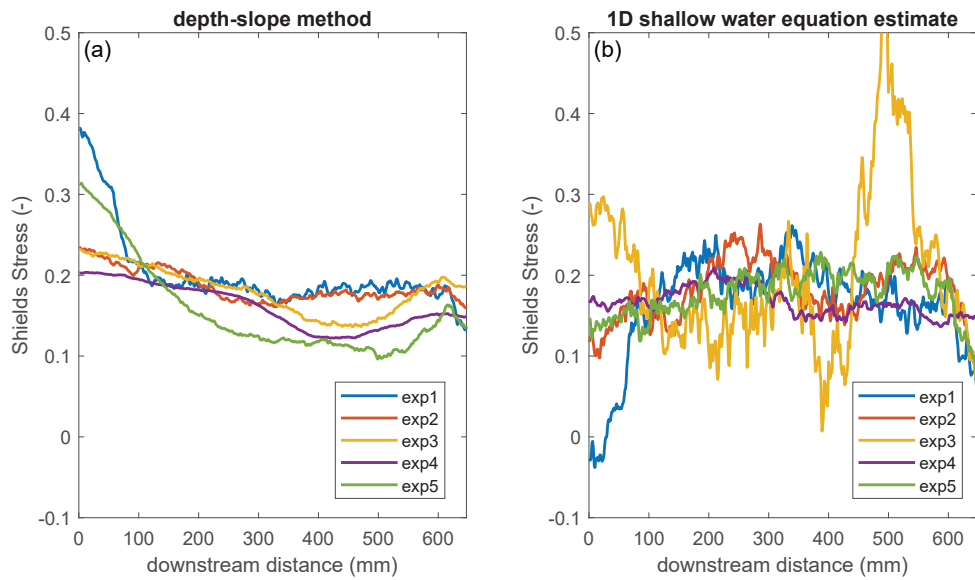

**Figure S4.** Local estimates of the Shields stress in the upstream channel. Profiles have been smoothed with a moving average window of 10 cm. Downstream edge of figure is the start of the bifurcation widening. (a) Shields stress profiles estimated using equation (S.5). (b) Shields stress profiles estimated using equation (S.6). As explained below in Text S1, the sediment flux values reported in the main paper should be regarded as more reliable than the Shields stress estimates.

| <b>Experiment</b> | Shields stress (eq. S.5) | Shields stress (eq. S.6) |
|-------------------|--------------------------|--------------------------|
| exp 1             | 0.25                     | 0.12                     |
| exp 2             | 0.22                     | 0.14                     |
| exp 3             | 0.21                     | 0.19                     |
| exp 4             | 0.19                     | 0.17                     |
| exp 5             | 0.23                     | 0.15                     |

**Table S1.** Estimates of the Shields stress averaged over the upstream 20 cm.

## Text S1 Estimation of the Shields Stress

In our paper, we chose to report the dimensionless sediment flux as opposed to the Shields stress, because sediment flux is the independent variable we directly controlled. However, previous studies on bifurcations used the upstream channel Shields stress instead. As discussed below, our dimensionless sediment flux measurement is more reliable than our Shields stress estimates.

5 Here, we report estimates of the Shields stress for each of our experiments, and discuss some of the complexities in obtaining these estimates.

The Shields stress is defined as

$$\tau_* = \frac{\tau_0}{(\rho_s - \rho)gd_s} \quad (\text{S.1})$$

where  $\tau_0$  is the bed shear stress, given by

$$10 \quad \tau_0 = \rho c_f u^2 \quad (\text{S.2})$$

where  $c_f$  is the dimensionless bed resistance coefficient, and  $u$  is the depth-averaged velocity. Assuming steady flow, the depth-averaged velocity is:

$$u = \frac{Q_w}{Wh} \quad (\text{S.3})$$

We can write the 1D shallow water equation as:

$$15 \quad \rho u^2 \frac{\partial h}{\partial x} + \rho g h S_w = \rho c_f u^2 \quad (\text{S.4})$$

where  $x$  is the streamwise coordinate, and  $S_w$  is the water surface slope. We see that the right-hand side of the equation is the shear stress (from equation S.2), and therefore, so is the left-hand side of the equation.

It is common to assume normal flow, in which case the first term of equation (S.4) is assumed to be small, and we recover the familiar depth-slope product:

$$20 \quad \tau_0 = \rho g h S_w \quad (\text{S.5})$$

Note that under normal flow conditions, the bed and water surfaces are parallel.

Alternatively, if we do not neglect the downstream gradient in depth, we obtain:

$$\tau_0 = \rho g h S_w + \rho u^2 \frac{\partial h}{\partial x} \quad (\text{S.6})$$

25 We note that in reality, the depth is not uniform in a channel cross-section, so in place of the depth  $h$ , we use the hydraulic radius  $h_R$ . Similar results are obtained using the average depth, given that our channels are relatively wide.

To compute the Shields stress, we obtain a local estimate for each cross-section in the upstream 20 cm of our scan, and average those values. Our estimates, using both equations (S.5) and (S.6), are shown in Table S1. We use only the upstream portion of the domain, because further downstream the depth is less uniform in the cross-flow direction. Due to the non-linearity of sediment transport, if the Shields stress in a cross-section is variable, then a sediment transport estimate using the average

30 Shields stress will underestimate the actual sediment transport. An additional reason is that 2-dimensional effects (i.e. cross-stream flow, induced for example by bars) are not accounted for in equation (S.6). We find that our estimates of the Shields stress are lower using equation (S.6) rather than (S.5), indicating that spatial accelerations cannot be neglected. We also note that exp 5 has the lowest sediment feed rate of our experiments, but based on either estimate does not have a lower Shields stress, as would be predicted.

35 We obtain Shields stress estimates using both equations (S.5) and (S.6). In Figure S4, we plot the Shields stress longitudinal profiles for the bypass portions of our experiments. Under bypass conditions, the sediment flux should be uniform on average in

the longitudinal direction, and therefore, so should the Shields stress. We observe in Figure S4 (a), the Shields stress decreases from upstream to downstream over the first 20 cm, most notably in experiments 1 and 5 (the two highest water discharge experiments). Figure S4 (b) shows that using the full equation (S.6) corrects for the over-prediction of the Shields stress in the upstream reach for experiment 5, but over-corrects experiment 3, at least within the first 10 cm. We also note that because equation (S.6) involves the derivative of the water depth, the noise in the profiles is greatly enhanced. Experiment 3 in particular has large fluctuations in the Shields stress that we do not believe are real, based on our argument that the sediment flux should be uniform from upstream to downstream.

Given the complexity of estimating the Shields stress as described above, and given that the dimensionless sediment flux is directly imposed, we believe that the dimensionless sediment flux is the more reliable measurement to report in our main paper, as opposed to the Shields stress. Again, from a theoretical vantage point, the Shields stress and dimensionless sediment flux are directly linked; setting the value of one implies a value for the other.
